# Supplementary material for: Graphene Oxide Quantum Dots Covalently Functionalized PVDF Membrane with Significantly-Enhanced Bactericidal and Antibiofouling Performances
Source: PubMed Central journal article supplement (PMC4735848; doi:10.1038/srep20142), 2016-02-02
Supplement: srep20142-s1.pdf [file srep20142-s1.pdf]

## **Supplementary Information for**

### **Graphene Oxide Quantum Dots Covalently Functionalized PVDF Membrane with Significantly-Enhanced Bactericidal and Antibiofouling Performance**

Zhiping Zeng<sup>1,2</sup>, Dingshan Yu<sup>3</sup>, Ziming He<sup>2</sup>, Jing Liu<sup>2</sup>, Fang-Xing Xiao<sup>2</sup>, Yan  
Zhang<sup>2</sup>, Rong Wang<sup>1</sup>, Dibakar Bhattacharyya<sup>4</sup>, Timothy Thatt Yang Tan<sup>2</sup>

<sup>1</sup> Singapore Membrane Technology Center, Nanyang Environment and Water Research  
Institute, Interdisciplinary Graduate School, Nanyang Technological University, Singapore;

<sup>2</sup> School of Chemical and Biomedical Engineering, Nanyang Technological University,

Singapore; <sup>3</sup> School of Chemistry and Chemical Engineering, Sun Yat-sen University,

Guangzhou, China; <sup>4</sup> Department of Chemical and Materials Engineering, University of  
Kentucky, Lexington, KY, USA

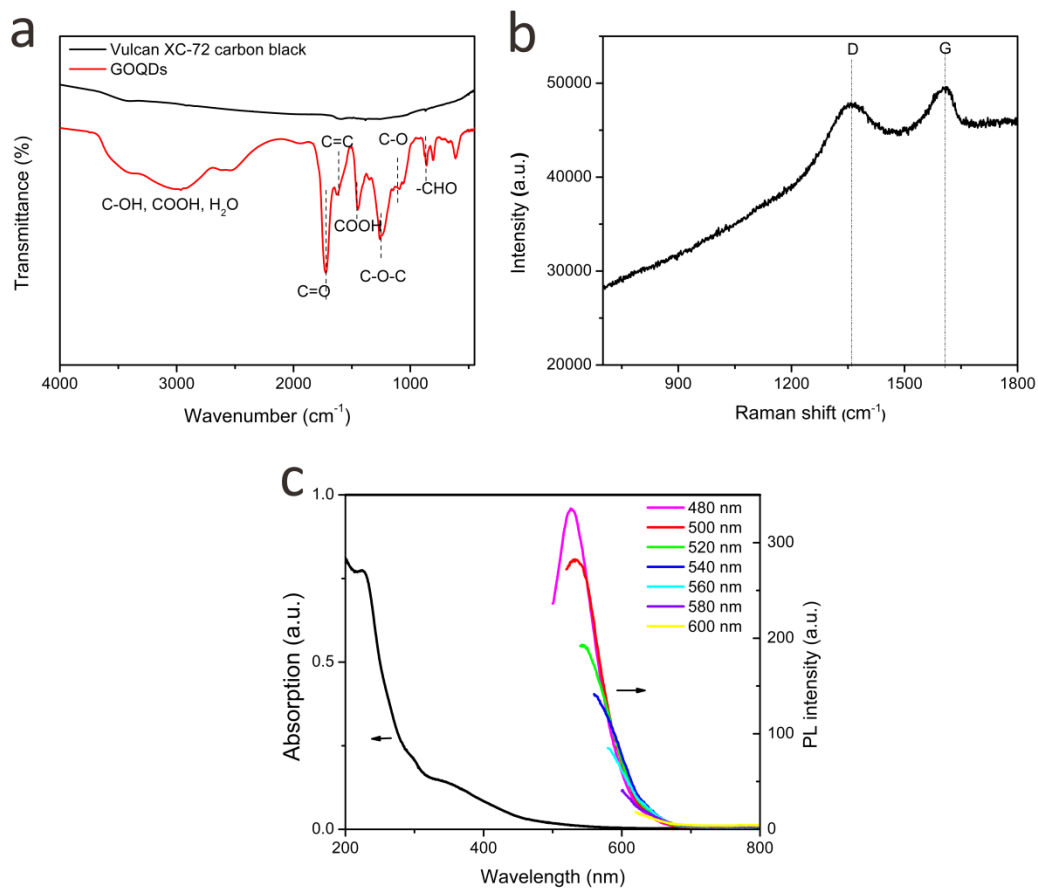

**Figure S1.** (a) FTIR spectra of carbon black and GOQDs; (b) Raman spectrum of GOQDs; (c) UV-vis absorption and PL emission spectra of the GOQDs aqueous solution.

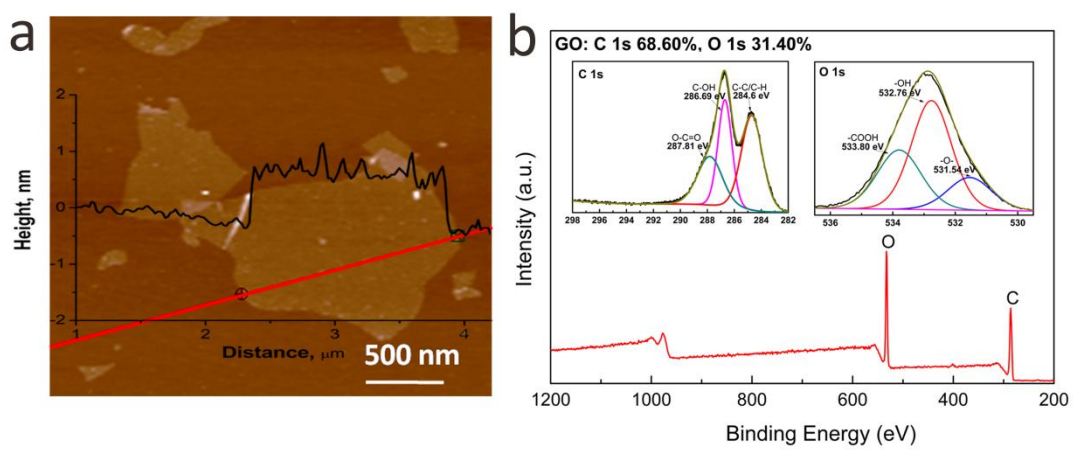

**Figure S2.** (a) Tapping mode AFM image of GO sheets, inset shows the height profile along the red line; (b) High-resolution XPS spectra of GO.

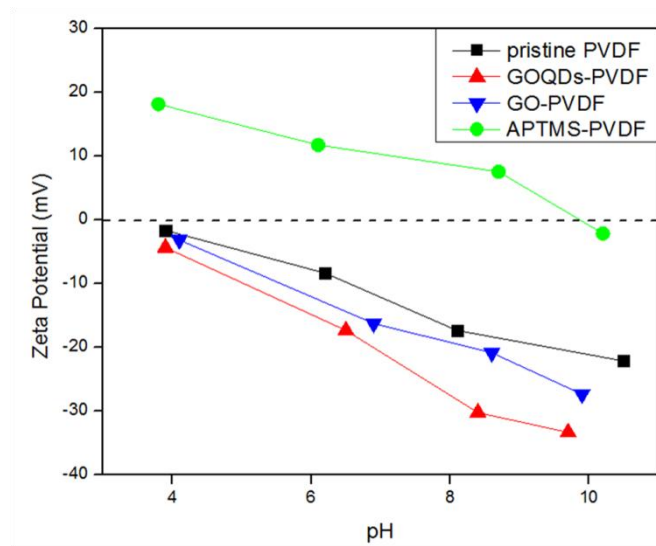

**Figure S3.** Zeta-potential of pristine PVDF, APTMS modified PVDF, GOQDs-PVDF and GO-PVDF membranes.

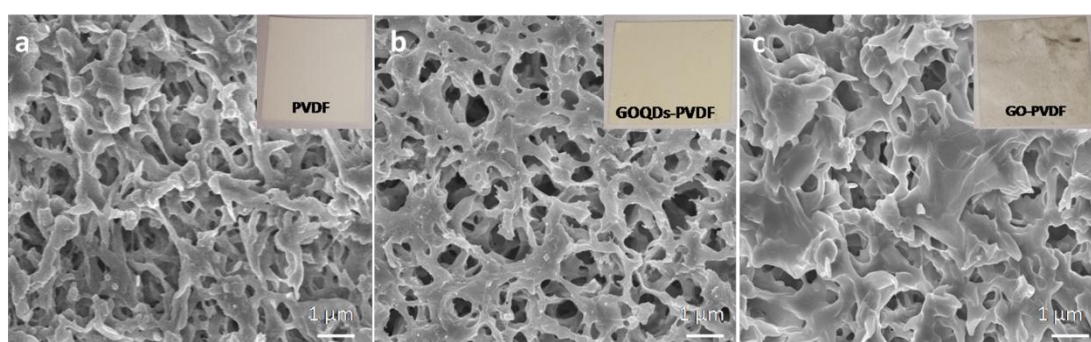

**Figure S4.** SEM images of PVDF (a), GO-PVDF (b), and GOQDs-PVDF (c). The upper inset are the optical images of the corresponding membranes.

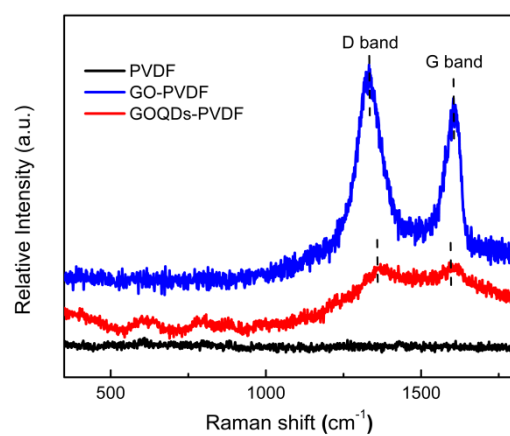

**Figure S5.** Raman spectra of pristine PVDF, GO-PVDF, GOQDs-PVDF membranes.

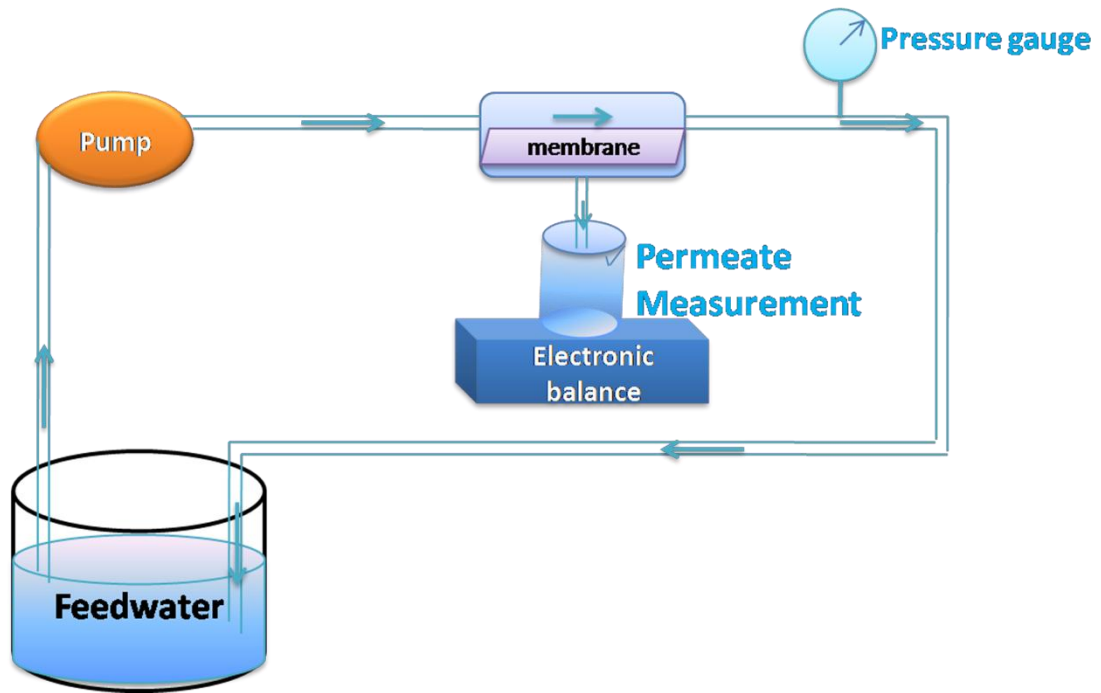

**Figure S6.** Schematic diagram of the batch experiment setup for filtration test.

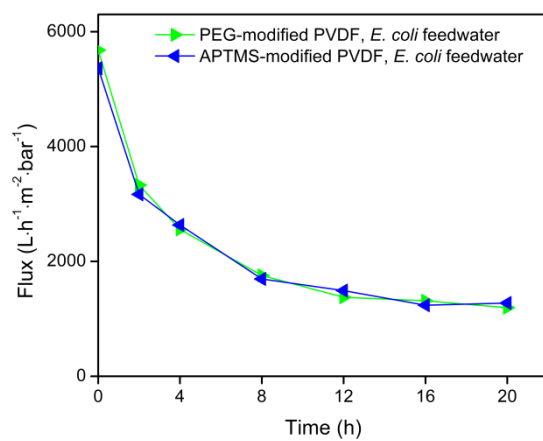

**Figure S7.** The flux change of PEG-modified PVDF, APTMS-modified PVDF membranes using *E. coli*-containing feedwater during a 20 h continuous filtration test.



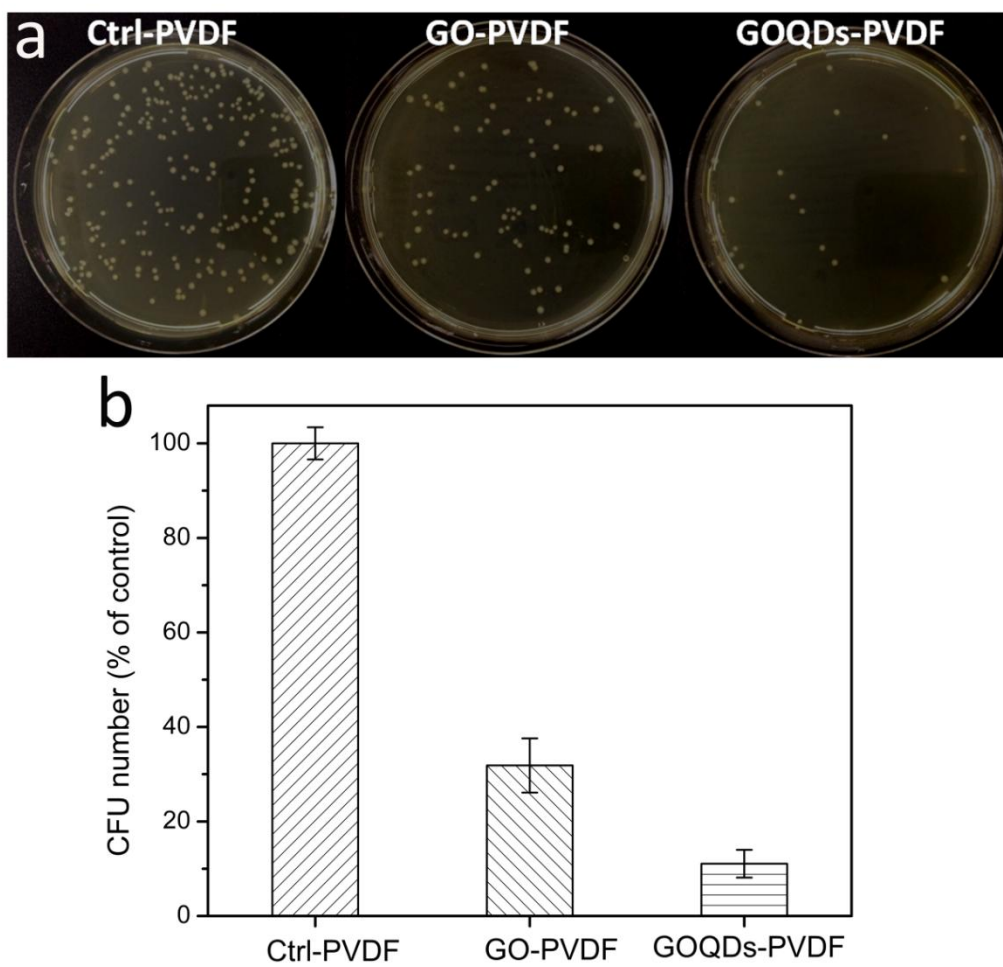

**Figure S8.** Graphene functionalized membranes reduce the number of *E. coli* cells colonies. (a) *E. coli* suspensions were exposed simultaneously to pristine PVDF, GO-PVDF and GOQDs-PVDF membranes for 1 h. (b) The difference of CFU for the different membranes; CFU was determined by standard plate count method.

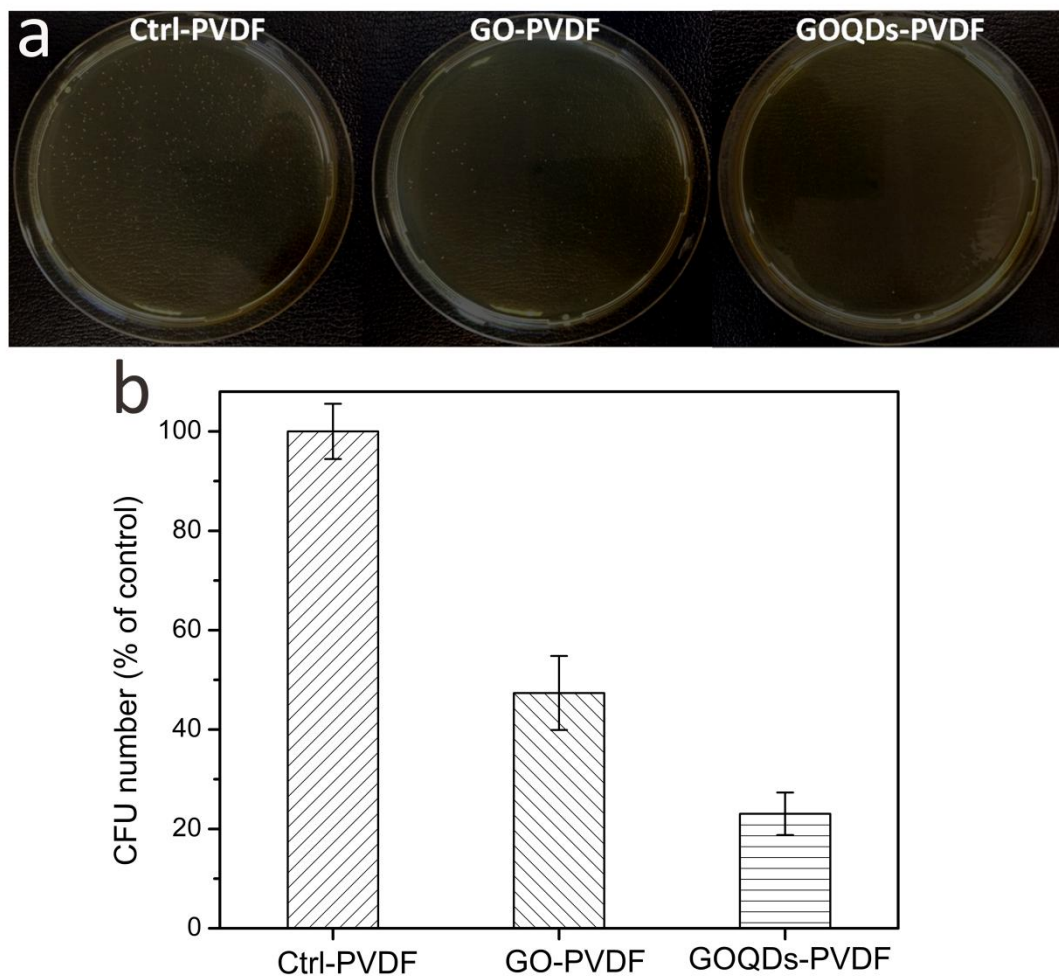

**Figure S9.** Graphene functionalized membrane reduce the number of *S. aureus* cells colonies. (a) *S. aureus* suspensions were exposed simultaneously to pristine PVDF, GO-PVDF and GOQDs-PVDF membranes for 1 h. (b) The difference of CFU for the different membranes; CFU was determined by standard plate count method.

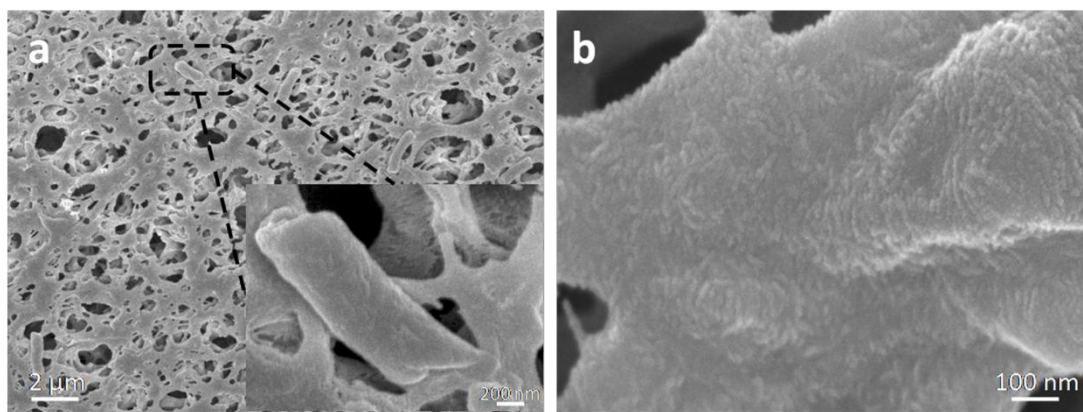

**Figure S10.** (a) SEM images of GOQDs-PVDF membrane after 10 h filtration test using *E. coli*-containing feedwater; inset the *E. coli* cell on the membrane surface; (b) High-resolution SEM image of GOQDs-PVDF after 10 h filtration test using *E. coli*-containing feedwater.

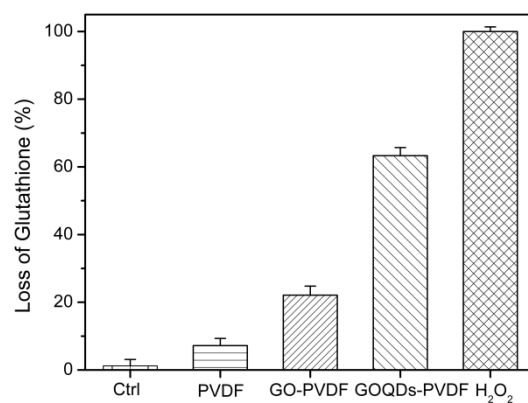

**Figure S11.** Loss of GSH (0.4 mM) after *in vitro* incubation with pristine PVDF and GO-PVDF for 1 h. H<sub>2</sub>O<sub>2</sub> (1 mM) is a positive control. The bicarbonate buffer (50 mM at pH 8.6) without membrane was used as a negative control.
